# Supplementary material for: Propelling a Course-Based Undergraduate Research Experience Using an Open-Access Online Undergraduate Research Journal
Source: PubMed Central journal article supplement (PMC7719674; doi:10.3389/fmicb.2020.589025), 2020-11-23
Supplement: Table_1.pdf [file Table_1.pdf]

## *Supplementary Material*

### 1 Supplementary Table

**Table S1.** Metadata compilation of UJEMI articles discussed in the two case studies.

| <b>Case Study 1</b> |                                |                                                                                                                                                                   |                                                                                                                                                                                                                 |
|---------------------|--------------------------------|-------------------------------------------------------------------------------------------------------------------------------------------------------------------|-----------------------------------------------------------------------------------------------------------------------------------------------------------------------------------------------------------------|
| <b>Year</b>         | <b>Authors</b>                 | <b>Title of Paper</b>                                                                                                                                             | <b>URL</b>                                                                                                                                                                                                      |
| 2006                | Chung, Hung, Lam, Madera       | Secondary effects of streptomycin and kanamycin on macromolecular composition of <i>Escherichia coli</i> B23 cell                                                 | <a href="https://www2.microbiology.ubc.ca/sites/default/files/roles/drupal_ungrad/JEMI/9/9-11.pdf">https://www2.microbiology.ubc.ca/sites/default/files/roles/drupal_ungrad/JEMI/9/9-11.pdf</a>                 |
| 2007                | Ganal, Gaudin, Roensch, Tran   | Effects of streptomycin and kanamycin on the production of capsular polysaccharides in <i>Escherichia coli</i> B23 cells                                          | <a href="https://www2.microbiology.ubc.ca/sites/default/files/roles/drupal_ungrad/JEMI/11/11-54.pdf">https://www2.microbiology.ubc.ca/sites/default/files/roles/drupal_ungrad/JEMI/11/11-54.pdf</a>             |
| 2008                | Lu, Trinh, Tsang, Yeung        | Effect of growth in sublethal levels of kanamycin and streptomycin on capsular polysaccharide production and antibiotic resistance in <i>Escherichia coli</i> B23 | <a href="https://www.microbiology.ubc.ca/sites/default/files/roles/drupal_ungrad/JEMI/12/12-21.pdf">https://www.microbiology.ubc.ca/sites/default/files/roles/drupal_ungrad/JEMI/12/12-21.pdf</a>               |
| 2009                | Fowler, Hu, Hou, Wong          | The effect of sub-inhibitory streptomycin on capsular polysaccharide production and streptomycin resistance in <i>Escherichia coli</i>                            | <a href="https://www.microbiology.ubc.ca/sites/default/files/roles/drupal_ungrad/JEMI/13/13-47.pdf">https://www.microbiology.ubc.ca/sites/default/files/roles/drupal_ungrad/JEMI/13/13-47.pdf</a>               |
| 2009                | Naimi, Nazer, Ong, Thong       | The role of <i>wza</i> in extracellular capsular polysaccharide levels during exposure to sublethal doses of streptomycin                                         | <a href="https://www.microbiology.ubc.ca/sites/default/files/roles/drupal_ungrad/JEMI/13/13-36.pdf">https://www.microbiology.ubc.ca/sites/default/files/roles/drupal_ungrad/JEMI/13/13-36.pdf</a>               |
| 2009                | Kam, Lou, Song                 | Effects of reduced capsular polysaccharide on kanamycin resistance in <i>Escherichia coli</i> B23 Cells                                                           | <a href="https://www.microbiology.ubc.ca/sites/default/files/roles/drupal_ungrad/JEMI/13/13-22.pdf">https://www.microbiology.ubc.ca/sites/default/files/roles/drupal_ungrad/JEMI/13/13-22.pdf</a>               |
| 2010/11             | Liu, Zhu, Zhu                  | persistence of antibiotic resistance and capsule in <i>E. coli</i> B23 after removal from sublethal kanamycin treatment                                           | <a href="https://www.microbiology.ubc.ca/sites/default/files/roles/drupal_ungrad/JEMI/15/JEMI15_43-46.pdf">https://www.microbiology.ubc.ca/sites/default/files/roles/drupal_ungrad/JEMI/15/JEMI15_43-46.pdf</a> |
| 2011                | Drayson, Leggat, Wood          | Increased antibiotic resistance post-exposure to sub-inhibitory concentrations is independent of capsular polysaccharide production in <i>Escherichia coli</i>    | <a href="https://www.microbiology.ubc.ca/sites/default/files/roles/drupal_ungrad/JEMI/15/JEMI15_36-42.pdf">https://www.microbiology.ubc.ca/sites/default/files/roles/drupal_ungrad/JEMI/15/JEMI15_36-42.pdf</a> |
| 2013                | Al Zahrani, Huang, Lam, Vafaie | Capsule formation is necessary for kanamycin tolerance in <i>Escherichia coli</i> K-12                                                                            | <a href="https://www.microbiology.ubc.ca/sites/default/files/roles/drupal_ungrad/JEMI/17/05.1G.pdf">https://www.microbiology.ubc.ca/sites/default/files/roles/drupal_ungrad/JEMI/17/05.1G.pdf</a>               |
| 2015                | Botros, Mitchell, Van Ommen    | Deletion of the <i>Escherichia coli</i> K30 group I capsule biosynthesis genes <i>wza</i> , <i>wzb</i> and <i>wzc</i>                                             | <a href="https://jemi.microbiology.ubc.ca/sites/default/files/Botros%20et%20al..pdf">https://jemi.microbiology.ubc.ca/sites/default/files/Botros%20et%20al..pdf</a>                                             |

|                     |                                        |                                                                                                                                                                                                                  |                                                                                                                                                                                                                                             |
|---------------------|----------------------------------------|------------------------------------------------------------------------------------------------------------------------------------------------------------------------------------------------------------------|---------------------------------------------------------------------------------------------------------------------------------------------------------------------------------------------------------------------------------------------|
|                     |                                        | confers capsule-independent resistance to macrolide antibiotics                                                                                                                                                  |                                                                                                                                                                                                                                             |
| 2016                | Rana, Jang, Ahn, Nan                   | Single deletion of <i>Escherichia coli</i> K30 group I capsule biosynthesis system component, <i>wzb</i> , is not sufficient to confer capsule-independent resistance to erythromycin                            | <a href="https://jemi.microbiology.ubc.ca/sites/default/files/JEMI20-4.pdf">https://jemi.microbiology.ubc.ca/sites/default/files/JEMI20-4.pdf</a>                                                                                           |
| 2017                | Su, Wang, Yeo                          | Deletion of the group 1 capsular gene <i>wza</i> in <i>Escherichia coli</i> E69 confers resistance to the antibiotic erythromycin on solid media but not in liquid media                                         | <a href="https://jemi.microbiology.ubc.ca/sites/default/files/Su%20et%20al%20JEMI%2B%20Vol%203%20pg%201-8.pdf">https://jemi.microbiology.ubc.ca/sites/default/files/Su%20et%20al%20JEMI%2B%20Vol%203%20pg%201-8.pdf</a>                     |
| 2017                | Jazdarehee, Anderson, Morrison, Pardoe | Deletion of <i>Escherichia coli</i> K30 type I capsule assembly gene <i>wzc</i> confers resistance to the antibiotic erythromycin in solid media                                                                 | <a href="https://jemi.microbiology.ubc.ca/sites/default/files/Jazdarehee%20et%20al%20JEMI%20Vol%2021%20pg%20108-112.pdf">https://jemi.microbiology.ubc.ca/sites/default/files/Jazdarehee%20et%20al%20JEMI%20Vol%2021%20pg%20108-112.pdf</a> |
| 2017                | Yuen, Ting, Kang, Wong                 | Investigation of Wza in erythromycin sensitivity of <i>Escherichia coli</i> K30 E69 by genetic complementation                                                                                                   | <a href="https://jemi.microbiology.ubc.ca/sites/default/files/Yuen%20et%20al%20JEMI%20Vol%2021%20pg%2052-57.pdf">https://jemi.microbiology.ubc.ca/sites/default/files/Yuen%20et%20al%20JEMI%20Vol%2021%20pg%2052-57.pdf</a>                 |
| 2017                | Chiu, Han, McCrystal, Zuo              | Macrolide structures can confer differential susceptibility in <i>Escherichia coli</i> K30 deletions of group 1 capsule assembly genes                                                                           | <a href="https://jemi.microbiology.ubc.ca/sites/default/files/Chiu%20et%20al%20JEMI%2B%20Vol%203%20pg%2050-56.pdf">https://jemi.microbiology.ubc.ca/sites/default/files/Chiu%20et%20al%20JEMI%2B%20Vol%203%20pg%2050-56.pdf</a>             |
| 2018                | Pochanart, Richardson, Truong, Wang    | Plasmid mediated complementation of <i>wza</i> in <i>Escherichia coli</i> K30 strain CWG281 restores erythromycin sensitivity                                                                                    | <a href="https://jemi.microbiology.ubc.ca/sites/default/files/Pochanart%20et%20al.%202018.pdf">https://jemi.microbiology.ubc.ca/sites/default/files/Pochanart%20et%20al.%202018.pdf</a>                                                     |
| 2018                | Abuan, AbuZuluf, Ban, Malekafzali      | Plasmid-mediated complementation of <i>wza</i> restores erythromycin susceptibility in <i>Escherichia coli</i> K30 strain CWG281                                                                                 | <a href="https://jemi.microbiology.ubc.ca/sites/default/files/Abuan-JEMI%2BVol4%202018.pdf">https://jemi.microbiology.ubc.ca/sites/default/files/Abuan-JEMI%2BVol4%202018.pdf</a>                                                           |
| 2018                | Gu, Khan, Pagulayan, Tam               | Deletion of the capsule phosphatase gene <i>wzb</i> renders <i>Escherichia coli</i> strain K30 sensitive to the antibiotic nitrofurantoin                                                                        | <a href="https://ujemi.microbiology.ubc.ca/sites/default/files/Gu-JEMI%2BVol4%202018.pdf">https://ujemi.microbiology.ubc.ca/sites/default/files/Gu-JEMI%2BVol4%202018.pdf</a>                                                               |
| 2020                | James, Kim, Pan, Zhong                 | Biofilm production in <i>Escherichia coli</i> K30 with group 1 capsular gene <i>wza</i> and <i>wza-wzb-wzc</i> deletions is not correlated with erythromycin resistance phenotypes in liquid media               | <a href="https://ojs.library.ubc.ca/index.php/UJEMI/article/view/193275/189971">https://ojs.library.ubc.ca/index.php/UJEMI/article/view/193275/189971</a>                                                                                   |
| <b>Case Study 2</b> |                                        |                                                                                                                                                                                                                  |                                                                                                                                                                                                                                             |
| <b>Year</b>         | <b>Authors</b>                         | <b>Title of Paper</b>                                                                                                                                                                                            | <b>URL</b>                                                                                                                                                                                                                                  |
| 2004                | Shah                                   | Preparing plasmid constructs to investigate the characteristics of thiol reductase and flavin reductase with regard to solubilizing insoluble proteinase inhibitor 2 in bacterial protein overexpression systems | <a href="https://www.microbiology.ubc.ca/sites/default/files/roles/drupal_ungrad/JEMI/6/6-20.pdf">https://www.microbiology.ubc.ca/sites/default/files/roles/drupal_ungrad/JEMI/6/6-20.pdf</a>                                               |
| 2004                | Kazem                                  | Cloning EDTA monoxygenase as a model protein to characterize the effects of flavin                                                                                                                               | <a href="https://www.microbiology.ubc.ca/sites/default/files/roles/drupal_ungrad/JEMI/6/6-26.pdf">https://www.microbiology.ubc.ca/sites/default/files/roles/drupal_ungrad/JEMI/6/6-26.pdf</a>                                               |

|      |                                         |                                                                                                                                                                                          |                                                                                                                                                                                                                           |
|------|-----------------------------------------|------------------------------------------------------------------------------------------------------------------------------------------------------------------------------------------|---------------------------------------------------------------------------------------------------------------------------------------------------------------------------------------------------------------------------|
|      |                                         | oxidoreductase on solubility of proteins in protein overexpression systems                                                                                                               |                                                                                                                                                                                                                           |
| 2006 | Park                                    | Generation of recombinant plasmid constructs to assess the ability of NADH:flavin oxidoreductase to solubilize proteinase inhibitor 2 in bacterial protein overexpression systems        | <a href="https://microbiology.ubc.ca/sites/default/files/roles/drupal_ungrad/JEMI/10/10-27.pdf">https://microbiology.ubc.ca/sites/default/files/roles/drupal_ungrad/JEMI/10/10-27.pdf</a>                                 |
| 2012 | Duronio                                 | Production of a recombinant vector to enable the study of thioredoxin function as a bound or detached solubilizer of proteinase inhibitor 2 in a bacterial protein overexpression system | <a href="https://www.microbiology.ubc.ca/sites/default/files/roles/drupal_ungrad/JEMI/16/JEMI16_79-84.pdf">https://www.microbiology.ubc.ca/sites/default/files/roles/drupal_ungrad/JEMI/16/JEMI16_79-84.pdf</a>           |
| 2015 | Przeworski, Pham, Wang, Murillo         | Attempted construction of recombinant vectors designed to study the solubility of overexpressed proteinase inhibitor 2 when co-expressed with thioredoxin                                | <a href="https://jemi.microbiology.ubc.ca/sites/default/files/Przeworski%20et%20al.pdf">https://jemi.microbiology.ubc.ca/sites/default/files/Przeworski%20et%20al.pdf</a>                                                 |
| 2016 | Lapointe, Li, Mortazavi, Zeng           | Expression and purification of a potato type II proteinase inhibitor in <i>Escherichia coli</i> strain BL21(DE3)                                                                         | <a href="https://jemi.microbiology.ubc.ca/sites/default/files/062916_Lapointe%20et%20al.pdf">https://jemi.microbiology.ubc.ca/sites/default/files/062916_Lapointe%20et%20al.pdf</a>                                       |
| 2017 | Ang, Atte, Halim, Jassal                | Effect of temperature, inducer concentration, and <i>Escherichia coli</i> cytosolic redox state on MBP-PI2 expression                                                                    | <a href="https://jemi.microbiology.ubc.ca/sites/default/files/Ang%20et%20al%20JEMI%20Vol%2021%20pg%2011-14.pdf">https://jemi.microbiology.ubc.ca/sites/default/files/Ang%20et%20al%20JEMI%20Vol%2021%20pg%2011-14.pdf</a> |
| 2017 | Forgarty, Alimohammadi, Siu, Stachowiak | Synthesis, cloning, and sequencing of a codon optimized variant of proteinase inhibitor ii designed for expression in <i>Escherichia coli</i>                                            | <a href="https://jemi.microbiology.ubc.ca/sites/default/files/Fogarty%20et%20al.pdf">https://jemi.microbiology.ubc.ca/sites/default/files/Fogarty%20et%20al.pdf</a>                                                       |
| 2020 | Grewal, Kim, Shi, Tong                  | Comparative expression of potato proteinase inhibitor type II in an oxidative versus reductive cytosolic environment of <i>Escherichia coli</i>                                          | <a href="https://ojs.library.ubc.ca/index.php/UJEMI/article/view/193194/190013">https://ojs.library.ubc.ca/index.php/UJEMI/article/view/193194/190013</a>                                                                 |
